# Supplementary material for: Orientation-controlled BaTiO3 thin films fabricated by chemical solution deposition
Source: Royal Society of Chemistry journal article supplement (doi:10.1039/c5ra22195a), 2015-01-01
Supplement: c5ra22195a1.pdf [file c5ra22195a1.pdf]

## **Electronic Supplementary Information**

### **Orientation-Controlled BaTiO<sub>3</sub> Thin Films Fabricated by Chemical Solution Deposition**

Tadasu Hosokura,\* Akira Ando, and Takehiro Konoike

Murata Manufacturing Co., Ltd.

10-1, Higashikotari, 1-chome, Nagaokakyo-shi, Kyoto 617-8555 Japan

\*e-mail address: hosokura@murata.com

**characterizations.**

Crystal characterizations were performed by X-ray diffraction (XRD) (Model RINT-KI, Rigaku, Tokyo, Japan). The orientation of the film along the axis parallel to the substrate was characterized by X-ray pole figure measurement (Model Smart Lab, Rigaku, Tokyo, Japan). Cross-sectional images of the obtained film were taken by a field emission-scanning electron microscope (FE-SEM) (Model S-5000, Hitachi, Tokyo, Japan). Cross-section images of the obtained films and selected area electron diffraction (SAED) patterns were taken by transmission electron microscope (TEM) (Model EM-002B, TOPCON, Tokyo, Japan). Cross-section images of the obtained film were also taken by spherical aberration corrected scanning transmission electron microscopy (Cs-STEM) (ARM-200F, JEOL, Tokyo, Japan). Polarization-electric field (P-E) hysteresis loops were measured using a ferroelectric tester (Precision Premier II, Radiant Technologies, Albuquerque, New Mexico, USA). Small signal AC (100 mV, 1 kHz) capacitance and dielectric constant temperature dependence were measured by using an LCR meter (HP 4284A, Hewlett-Packard, Palo Alto, California, USA). DC resistivities were measured by using an Electrometer (Model 6517A, Keithley Instruments, Cleveland, Ohio, USA).

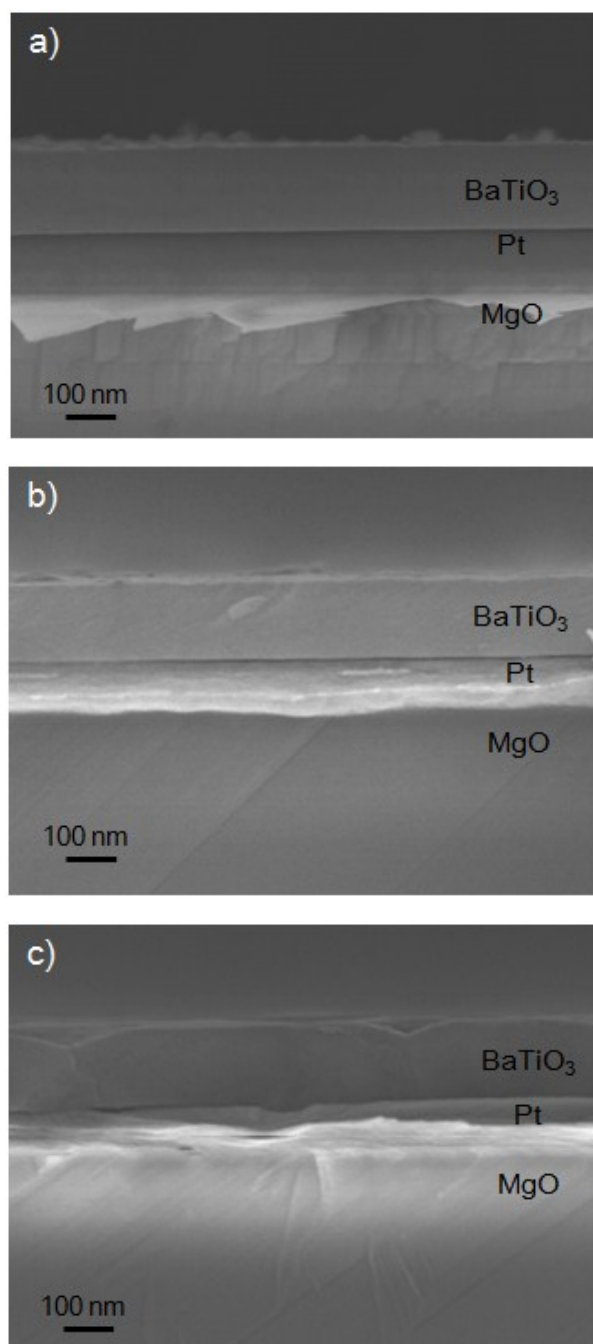

Fig. S1 Cross-sectional FE-SEM image of (a) BaTiO<sub>3</sub>(100) film on a Pt(100)/MgO(100) substrate, (b) BaTiO<sub>3</sub>(110) film on a Pt(110)/MgO(110) substrate, and (c) BaTiO<sub>3</sub>(111) on a Pt(111)/MgO(111) substrate.

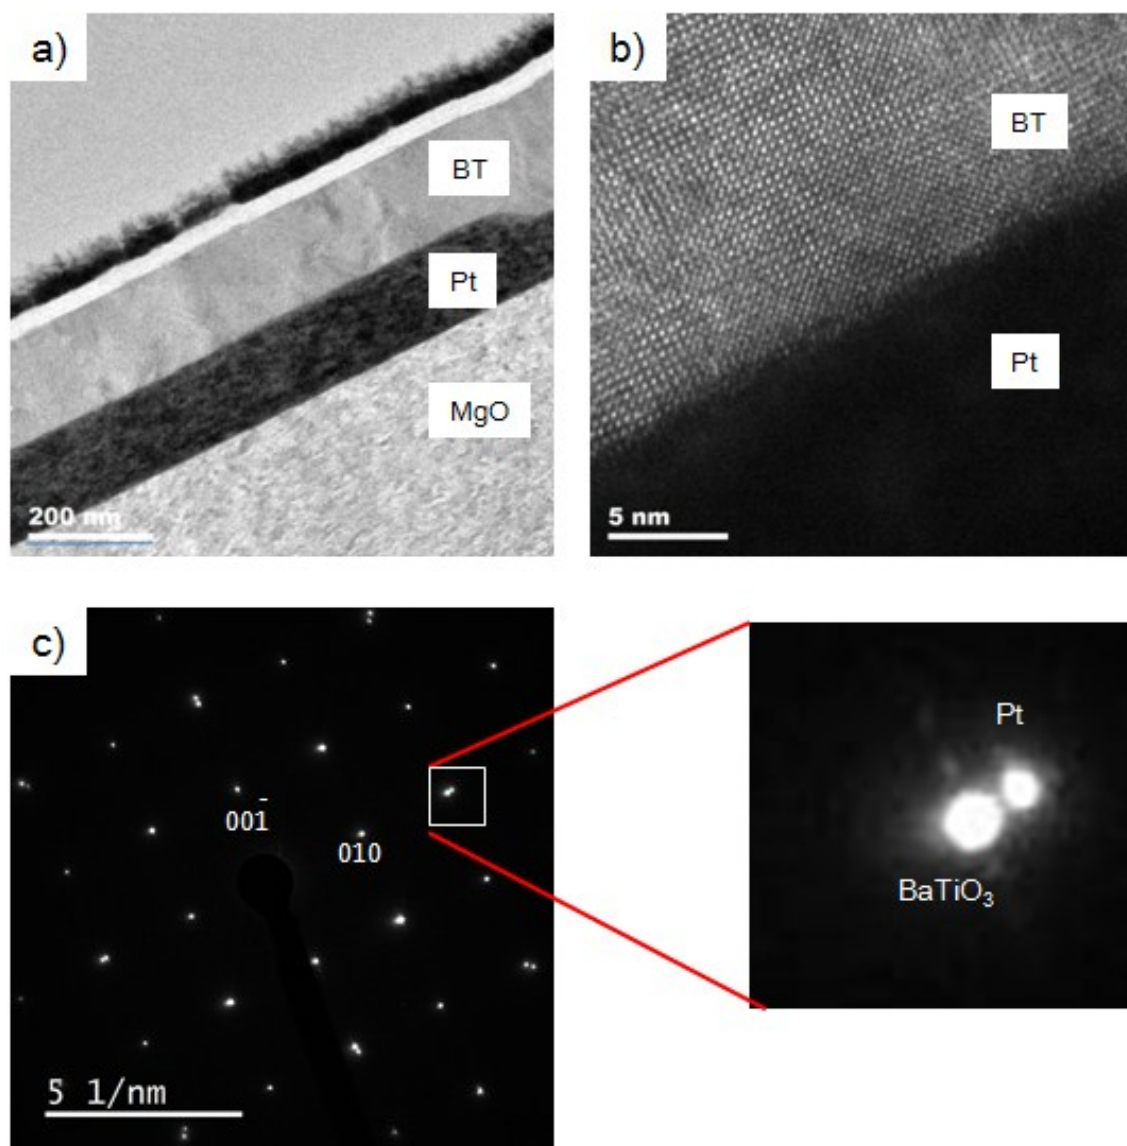

Fig. S2 (a) Cross-sectional TEM images of the BaTiO<sub>3</sub>(100) film on Pt(100)/MgO(100), (b) boundary of the BaTiO<sub>3</sub>(100) film and Pt(100) film, and (c) SAED of boundary of the BaTiO<sub>3</sub>(100) film and Pt(100) film.

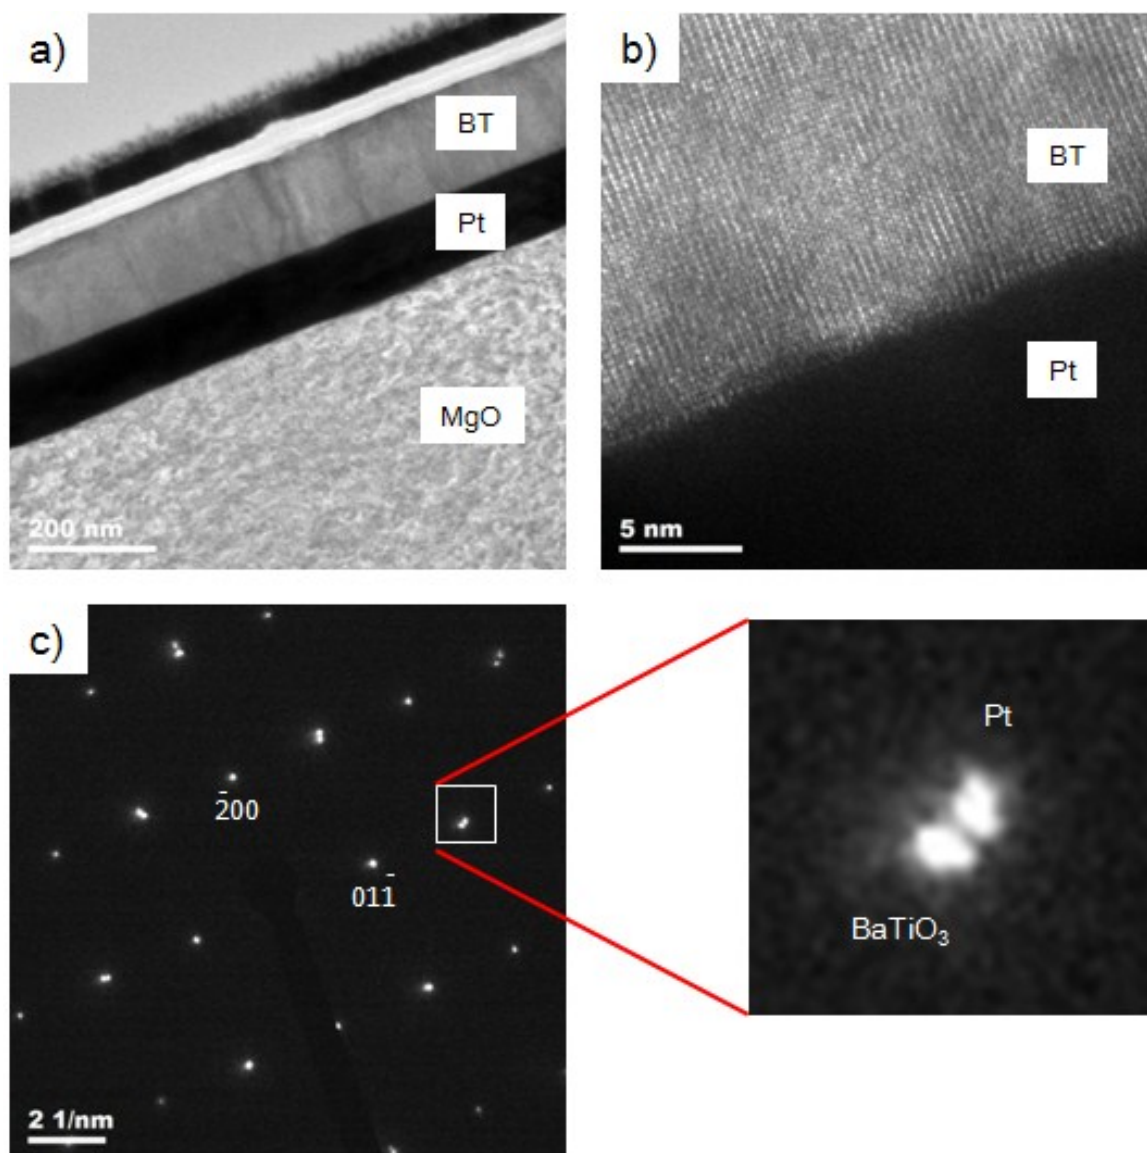

Fig. S3 (a) Cross-sectional TEM images of the BaTiO<sub>3</sub>(110) film on Pt(110)/MgO(110), (b) boundary of the BaTiO<sub>3</sub>(110) film and Pt(110) film, and (c) SAED of boundary of the BaTiO<sub>3</sub>(110) film and Pt(110) film.

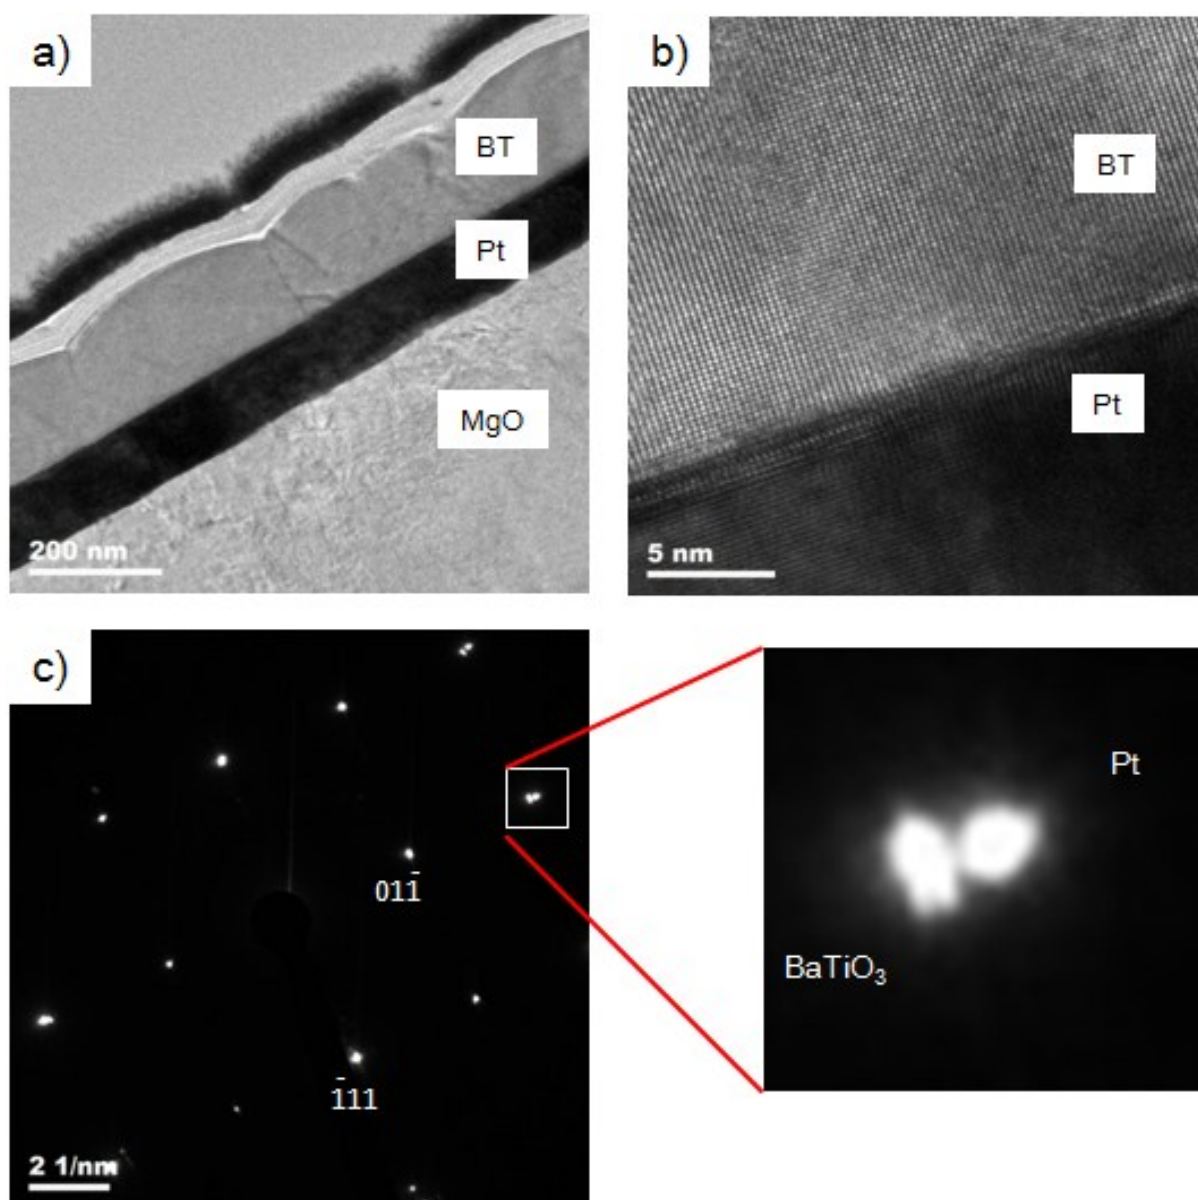

Fig. S4 (a) Cross-sectional TEM images of the BaTiO<sub>3</sub>(111) film on Pt(111)/MgO(111), (b) boundary of the BaTiO<sub>3</sub>(111) film and Pt(111) film, and (c) SAED of boundary of the BaTiO<sub>3</sub>(111) film and Pt(110) film.

**Table S1. Elastic constants and tensile stress in the plane of the growth direction of (100)-, (110)-, and (111)-oriented film.**

| Orientation of the film | Elastic constants                | Calculated elastic constants (GPa) | Lattice expansion (%) | Estimated tensile stress (GPa) |
|-------------------------|----------------------------------|------------------------------------|-----------------------|--------------------------------|
| (100)                   | $C_{11}$                         | 173                                | 1.50                  | 2.60                           |
| (110)                   | $(C_{11} + C_{12})/2 + C_{44}$   | 237.5                              | 4.25                  | 10.09                          |
| (111)                   | $(C_{11} + 2C_{12} + 4C_{44})/3$ | 256.33                             | 6.22                  | 15.94                          |

**Table S2. Properties of thin films prepared from a variety of film orientations measured at 1 kHz and 0.1 V and DC resistivity at 300 kV/cm.**

| Orientation of the film                   | Thickness (nm) | Measured capacitance (nF) | Dielectric constant | tan (delta) |
|-------------------------------------------|----------------|---------------------------|---------------------|-------------|
| BaTiO <sub>3</sub> (100)/Pt(100)/MgO(100) | 165            | 11.68                     | 1107                | 0.043       |
| BaTiO <sub>3</sub> (110)/Pt(110)/MgO(110) | 160            | 22.10                     | 2030                | 0.058       |
| BaTiO <sub>3</sub> (111)/Pt(111)/MgO(111) | 165            | 22.54                     | 2072                | 0.061       |

**Table S3. DC resistivity of thin films prepared from a variety of film orientations measured at 300 kV/cm.**

| Orientation of the film                   | Resistivity ( $\Omega \cdot \text{cm}$ ) |
|-------------------------------------------|------------------------------------------|
| BaTiO <sub>3</sub> (100)/Pt(100)/MgO(100) | $5.91 \times 10^8$                       |
| BaTiO <sub>3</sub> (110)/Pt(110)/MgO(110) | $4.48 \times 10^8$                       |
| BaTiO <sub>3</sub> (111)/Pt(111)/MgO(111) | $8.70 \times 10^7$                       |
